# Supplementary material for: Glioma Cells Acquire Stem-like Characters by Extrinsic Ribosome Stimuli
Source: MDPI journal article supplement (doi:10.3390/cells10112970), 2021-11-01
Supplement: s1 [file s1]

Supplementary Material

# Glioma Cells Acquire Stem-like Characters by Extrinsic Ribosome Stimuli

Yuki Shirakawa <sup>1</sup>, Kunimasa Ohta <sup>2</sup>, Shunsuke Miyake <sup>1,3</sup>, Ayumi Kanemaru <sup>1</sup>, Akari Kuwano <sup>1</sup>, Kou Yonemaru <sup>1</sup>, Shota Uchino <sup>1</sup>, Michiko Yamaoka <sup>1</sup>, Yuki Ito <sup>1</sup>, Naofumi Ito <sup>4</sup>, Takuichiro Hide <sup>5</sup>, Naoki Shinojima <sup>6</sup>, Akitake Mukasa <sup>6</sup>, Hideyuki Saito <sup>1,3</sup> and Hirofumi Jono <sup>1,3,\*</sup>

<sup>1</sup> Department of Clinical Pharmaceutical Sciences, Graduate School of Pharmaceutical Sciences, Kumamoto University, Kumamoto 860-8556, Japan; y.shirakawa.da@juntendo.ac.jp (Y.S.); 191y2005@st.kumamoto-u.ac.jp (S.M.); 197y2002@st.kumamoto-u.ac.jp (A.K.); ak.1212@icloud.com (A.K.); 179p1054@st.kumamoto-u.ac.jp (K.Y.); 175p1008@st.kumamoto-u.ac.jp (S.U.); yfe31628@gmail.com (M.Y.); 161p1003@st.kumamoto-u.ac.jp (Y.I.); saitohide@kuh.kumamoto-u.ac.jp (H.S.)

<sup>2</sup> Department of Stem Cell Biology, Faculty of Arts and Science, Kyushu University, Fukuoka 819-0385, Japan; ohta9203@artsci.kyushu-u.ac.jp

<sup>3</sup> Department of Pharmacy, Kumamoto University Hospital, Kumamoto 860-8556, Japan

<sup>4</sup> Department of Developmental Neurobiology, Graduate School of Life Sciences, Kumamoto University, Kumamoto 860-8556, Japan; mikan03orange@gmail.com

<sup>5</sup> Department of Neurosurgery, Kitasato University School of Medicine, 252-0375, Kanagawa, Japan; thide@med.kitasato-u.ac.jp

<sup>6</sup> Department of Neurosurgery, Graduate School of Medical Sciences, Kumamoto University, Kumamoto 860-8556, Japan; nshinojima-kuh@umin.ac.jp (N.S.); mukasa@kumamoto-u.ac.jp (A.M.)

\* Correspondence: hjono@kuh.kumamoto-u.ac.jp; Tel.: +81-96-373-5823

**Table S1.** Co-localization of phosphorylated RPS6 with Nestin or CD34 in glioma tissues.

| Ave. double-positive cells rate / image (%) |              |
|---------------------------------------------|--------------|
| Nestin +<br>/pRPS6 +                        | 73.15 ± 9.41 |
| CD34 +<br>/pRPS6 +                          | 3.95 ± 2.22  |

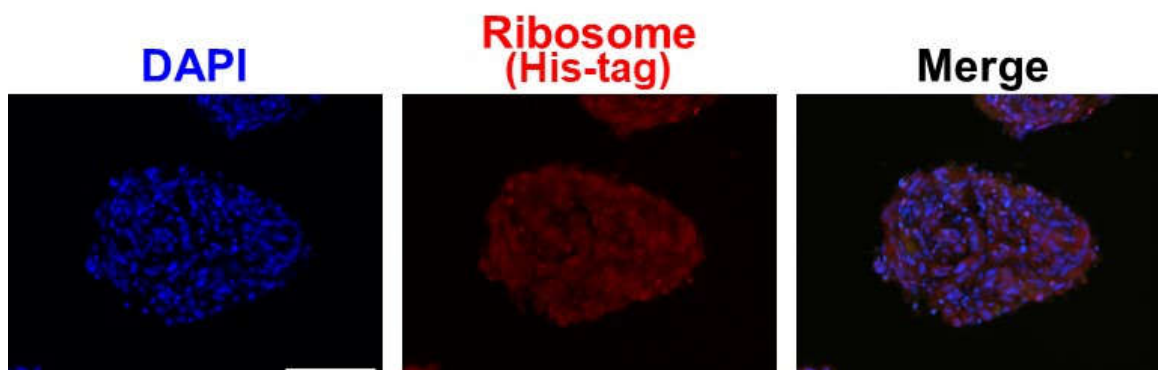

**Figure S1.** Representative pictures of immunohistochemical analysis for RICCS. Images showing immunohistochemical staining for His-tag conjugated ribosome in RICCS.

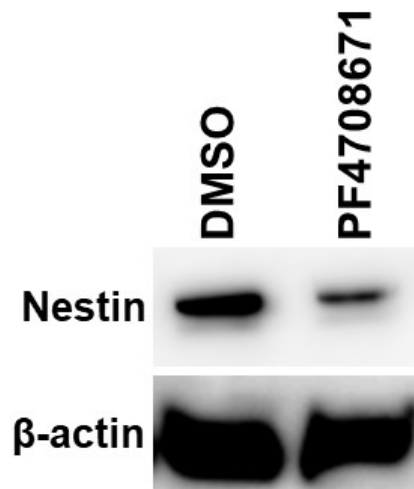

**Figure S2.** Western blotting showing the stem cell markers, Nestin in U251MG cells. PF4708671 reduced Nestin expression in U251MG cells.

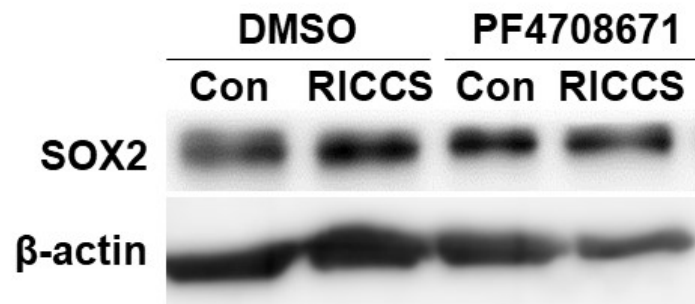

**Figure S3.** Western blotting showing the stem cell markers, Sox2 in RICCS. Sox2 expression in RICCS was down-regulated by PF4708671 treatment.
